# Supplementary material for: A design of experiments approach for the rapid formulation of a chemically defined medium for metabolic profiling of industrially important microbes
Source: PubMed Central journal article supplement (PMC6561596; doi:10.1371/journal.pone.0218208), 2019-06-12
Supplement: pone.0218208.s001.pdf [file pone.0218208.s001.pdf]

| Species                         | Media         | Carbon source                                                | Bionutrient                                                      | Reference |
|---------------------------------|---------------|--------------------------------------------------------------|------------------------------------------------------------------|-----------|
| <i>G. thermoglucosidasius</i>   | TB-ASM        | 0.1 g L <sup>-1</sup> cellobiose, glucose or xylose          | 10 g L <sup>-1</sup> tryptone, 1 g L <sup>-1</sup> yeast extract | [7]       |
| <i>Geobacillus</i> strain LC300 | Growth medium | 2 g L <sup>-1</sup> xylose                                   | 0.05 g L <sup>-1</sup> yeast extract                             | [9]       |
| <i>G. thermoglucosidasius</i>   | ASYE          | 20 g L <sup>-1</sup> glucose                                 | 5 g L <sup>-1</sup> yeast extract                                | [5]       |
| <i>G. thermoglucosidasius</i>   | USYE          | 30 g L <sup>-1</sup> glucose                                 | 10 g L <sup>-1</sup> yeast extract                               | [5]       |
| <i>G. thermoglucosidasius</i>   | USYE          | 10 g L <sup>-1</sup> glucose                                 | 1 g L <sup>-1</sup> tryptone, 1 g L <sup>-1</sup> yeast extract  | [5]       |
| <i>G. thermoglucosidasius</i>   | USYE          | 30 g L <sup>-1</sup> cellobiose or xylose                    | 10 g L <sup>-1</sup> yeast extract                               | [5]       |
| <i>G. thermoglucosidasius</i>   | TMM           | 2 g L <sup>-1</sup> glucose, xylose, arabinose or cellobiose | 0.2 or 0.5 g L <sup>-1</sup> yeast extract                       | [10]      |
| <i>G. thermoglucosidasius</i>   | CBM           | N/A                                                          | 4 g L <sup>-1</sup> casein hydrolysate                           | [8]       |
| <i>G. thermoglucosidasius</i>   | ASYE          | 20 g L <sup>-1</sup> glucose                                 | 10 g L <sup>-1</sup> yeast extract                               | [8]       |
| <i>G. kaustophilus</i>          | MM            | Various                                                      | 1 g L <sup>-1</sup> casamino Acids                               | [11]      |
| <i>G. kaustophilus</i>          | MY            | 10 g L <sup>-1</sup> maltose                                 | 10 g L <sup>-1</sup> yeast extract                               | [11]      |
| <i>G. thermoglucosidasius</i>   | TMLM          | 10 g L <sup>-1</sup> glucose                                 | 1 g L <sup>-1</sup> yeast extract                                | [37]      |
| <i>G. thermoglucosidasius</i>   | USYE          | 30 g L <sup>-1</sup> glucose or cellobiose                   | 1 g L <sup>-1</sup> yeast extract                                | [37]      |

**Table S1. Bionutrient requirements of *Geobacilli*.**

A review of the literature summarising semi-defined media used to grow various species of *Geobacillus*, highlighting the concentration of complex bionutrients added to these media.
