# Supplementary material for: A design of experiments approach for the rapid formulation of a chemically defined medium for metabolic profiling of industrially important microbes
Source: PubMed Central journal article supplement (PMC6561596; doi:10.1371/journal.pone.0218208), 2019-06-12
Supplement: pone.0218208.s002.pdf [file pone.0218208.s002.pdf]

| Chemical                       | Maximum concentration mM | Reference  |
|--------------------------------|--------------------------|------------|
| Ammonium chloride              | 50                       | [13]       |
| Ammonium nitrate               | 50                       | This paper |
| Ammonium sulphate              | 50                       | [7]        |
| Potassium sulphate             | 50                       | [7]        |
| Potassium nitrate              | 50                       | This paper |
| Sodium carbonate               | 1                        | This paper |
| Sodium chloride                | 8.6                      | [27]       |
| Dipotassium hydrogen phosphate | 33                       | This paper |
| Sodium di-hydrogen phosphate   | 17                       | [7]        |
| Urea                           | 50                       | [5]        |
| Citric acid                    | 10                       | [5]        |
| MOPS                           | 50                       | [26]       |
| Calcium chloride               | 1                        | [23]       |
| Iron sulphate                  | 0.1                      | [23]       |
| Magnesium sulphate             | 1                        | [23]       |
| NTA sodium salt                | 1                        | [23]       |
| EDTA sodium salt               | 1                        | [13]       |

**Table S2. Defined media ingredients.** Commonly used ingredients found in defined media recipes for a variety of microorganisms identified in the literature with maximum concentrations used during the DoE experiments.
