# Supplementary material for: A design of experiments approach for the rapid formulation of a chemically defined medium for metabolic profiling of industrially important microbes
Source: PubMed Central journal article supplement (PMC6561596; doi:10.1371/journal.pone.0218208), 2019-06-12
Supplement: pone.0218208.s003.pdf [file pone.0218208.s003.pdf]

| Chemical           | Formula                                             | 500 x concentration mM | 1 x concentration $\mu$ M |
|--------------------|-----------------------------------------------------|------------------------|---------------------------|
| Zinc sulphate      | ZnSO <sub>4</sub> .7H <sub>2</sub> O                | 12.5                   | 25.0                      |
| Nickel sulphate    | NiSO <sub>4</sub> .6H <sub>2</sub> O                | 8.52                   | 17.0                      |
| Manganese sulphate | MnSO <sub>4</sub> .H <sub>2</sub> O                 | 7.51                   | 15.0                      |
| Cobalt sulphate    | CoSO <sub>4</sub> .7H <sub>2</sub> O                | 5.98                   | 9.96                      |
| Copper sulphate    | CuSO <sub>4</sub> .5H <sub>2</sub> O                | 2.52                   | 5.05                      |
| Disodium molybdate | Na <sub>2</sub> MoO <sub>4</sub> .2H <sub>2</sub> O | 0.87                   | 1.74                      |
| Boric acid         | H <sub>3</sub> BO <sub>3</sub>                      | 0.16                   | 0.32                      |
| Sulfuric acid      | H <sub>2</sub> SO <sub>4</sub>                      | 60 (5 ml of 12 M)      | 120                       |

**Table S3. 100x trace metal solution.**

Composition of the trace metal solution developed based on the reviewed defined media recipes.
