# Supplementary material for: A design of experiments approach for the rapid formulation of a chemically defined medium for metabolic profiling of industrially important microbes
Source: PubMed Central journal article supplement (PMC6561596; doi:10.1371/journal.pone.0218208), 2019-06-12
Supplement: pone.0218208.s005.pdf [file pone.0218208.s005.pdf]

| Experiment | Block | Ammonium chloride | Ammonium sulphate | Potassium nitrate | Sodium carbonate | Sodium chloride | Phosphate buffer | Urea | Bis-Tris | Yeast extract |
|------------|-------|-------------------|-------------------|-------------------|------------------|-----------------|------------------|------|----------|---------------|
| 1          | 1     | 0                 | 50                | 50                | 0                | 0               | 0                | 0    | 0        | 0             |
| 2          | 1     | 50                | 50                | 0                 | 1                | 0               | 0                | 50   | 50       | 0.1           |
| 3          | 1     | 50                | 0                 | 50                | 0                | 0               | 50               | 0    | 0        | 0             |
| 4          | 1     | 0                 | 50                | 50                | 1                | 8.6             | 0                | 0    | 50       | 0.1           |
| 5          | 1     | 50                | 50                | 50                | 1                | 0               | 50               | 0    | 50       | 0             |
| 6          | 1     | 0                 | 50                | 50                | 1                | 8.6             | 50               | 0    | 0        | 0             |
| 7          | 1     | 50                | 0                 | 50                | 1                | 0               | 0                | 50   | 0        | 0             |
| 8          | 1     | 0                 | 50                | 0                 | 0                | 0               | 50               | 0    | 50       | 0.1           |
| 9          | 2     | 50                | 50                | 0                 | 1                | 0               | 0                | 0    | 0        | 0             |
| 10         | 2     | 50                | 0                 | 0                 | 1                | 0               | 50               | 50   | 50       | 0             |
| 11         | 2     | 0                 | 50                | 50                | 1                | 0               | 0                | 0    | 0        | 0.1           |
| 12         | 2     | 50                | 50                | 50                | 0                | 0               | 50               | 50   | 0        | 0             |
| 13         | 2     | 50                | 0                 | 0                 | 1                | 8.6             | 0                | 0    | 50       | 0             |
| 14         | 2     | 50                | 0                 | 0                 | 1                | 0               | 50               | 0    | 50       | 0.1           |
| 15         | 2     | 0                 | 0                 | 50                | 0                | 0               | 50               | 50   | 50       | 0             |
| 16         | 2     | 0                 | 50                | 0                 | 0                | 8.6             | 0                | 50   | 0        | 0.1           |
| 17         | 3     | 0                 | 0                 | 0                 | 1                | 0               | 50               | 50   | 50       | 0.1           |
| 18         | 3     | 0                 | 0                 | 50                | 1                | 8.6             | 50               | 50   | 50       | 0             |
| 19         | 3     | 50                | 0                 | 50                | 0                | 0               | 0                | 0    | 50       | 0.1           |
| 20         | 3     | 0                 | 0                 | 0                 | 0                | 8.6             | 50               | 0    | 50       | 0             |
| 21         | 3     | 0                 | 50                | 50                | 1                | 8.6             | 50               | 50   | 0        | 0.1           |
| 22         | 3     | 0                 | 0                 | 50                | 0                | 8.6             | 50               | 50   | 0        | 0.1           |
| 23         | 3     | 0                 | 0                 | 0                 | 0                | 8.6             | 50               | 50   | 0        | 0             |
| 24         | 3     | 50                | 50                | 50                | 0                | 8.6             | 0                | 0    | 50       | 0             |
| 25         | 4     | 50                | 50                | 50                | 0                | 0               | 50               | 0    | 0        | 0.1           |
| 26         | 4     | 50                | 50                | 0                 | 0                | 0               | 0                | 50   | 50       | 0             |
| 27         | 4     | 0                 | 0                 | 0                 | 1                | 0               | 0                | 0    | 50       | 0             |
| 28         | 4     | 0                 | 0                 | 50                | 0                | 8.6             | 0                | 0    | 50       | 0             |
| 29         | 4     | 50                | 50                | 0                 | 0                | 8.6             | 0                | 0    | 50       | 0.1           |
| 30         | 4     | 50                | 0                 | 50                | 1                | 8.6             | 0                | 50   | 50       | 0.1           |
| 31         | 4     | 50                | 0                 | 0                 | 0                | 8.6             | 0                | 0    | 0        | 0             |
| 32         | 4     | 50                | 50                | 0                 | 1                | 8.6             | 50               | 0    | 0        | 0.1           |
| 33         | 5     | 50                | 50                | 0                 | 0                | 8.6             | 50               | 50   | 50       | 0.1           |
| 34         | 5     | 50                | 0                 | 50                | 0                | 8.6             | 0                | 50   | 50       | 0             |
| 35         | 5     | 50                | 0                 | 0                 | 0                | 0               | 50               | 50   | 0        | 0.1           |
| 36         | 5     | 50                | 0                 | 50                | 0                | 8.6             | 50               | 0    | 50       | 0.1           |
| 37         | 5     | 50                | 50                | 0                 | 1                | 8.6             | 0                | 50   | 50       | 0             |
| 38         | 5     | 50                | 50                | 0                 | 0                | 8.6             | 50               | 0    | 0        | 0             |
| 39         | 5     | 0                 | 50                | 50                | 0                | 8.6             | 50               | 50   | 50       | 0             |
| 40         | 5     | 0                 | 0                 | 0                 | 0                | 0               | 0                | 50   | 0        | 0             |
| 41         | 6     | 0                 | 0                 | 0                 | 0                | 8.6             | 0                | 50   | 50       | 0.1           |
| 42         | 6     | 0                 | 0                 | 0                 | 1                | 8.6             | 50               | 0    | 0        | 0.1           |
| 43         | 6     | 0                 | 0                 | 0                 | 0                | 0               | 0                | 0    | 0        | 0.1           |
| 44         | 6     | 50                | 50                | 50                | 0                | 8.6             | 0                | 50   | 0        | 0.1           |
| 45         | 6     | 0                 | 0                 | 0                 | 1                | 0               | 50               | 0    | 0        | 0             |
| 46         | 6     | 50                | 0                 | 50                | 1                | 8.6             | 0                | 0    | 0        | 0.1           |
| 47         | 6     | 0                 | 0                 | 50                | 1                | 8.6             | 0                | 50   | 0        | 0.1           |
| 48         | 6     | 50                | 0                 | 0                 | 1                | 8.6             | 0                | 50   | 0        | 0.1           |
| 49         | 7     | 50                | 0                 | 50                | 1                | 8.6             | 50               | 50   | 0        | 0             |
| 50         | 7     | 0                 | 0                 | 50                | 1                | 0               | 50               | 0    | 50       | 0.1           |
| 51         | 7     | 0                 | 50                | 0                 | 1                | 0               | 50               | 50   | 0        | 0             |
| 52         | 7     | 0                 | 50                | 50                | 1                | 0               | 0                | 50   | 50       | 0             |
| 53         | 7     | 0                 | 50                | 50                | 0                | 0               | 0                | 50   | 50       | 0.1           |
| 54         | 7     | 50                | 0                 | 50                | 1                | 0               | 50               | 50   | 0        | 0.1           |
| 55         | 7     | 0                 | 50                | 0                 | 1                | 8.6             | 0                | 0    | 0        | 0             |
| 56         | 7     | 0                 | 50                | 0                 | 1                | 8.6             | 50               | 0    | 50       | 0             |

**Table S5. Second iteration of defined media development.**

The 56 media formulations generated by the Custom Design platform of the JMP software. The nine media ingredients were identified in the first iteration as influencing *G. thermoglucosidans* growth.
