# Supplementary material for: A design of experiments approach for the rapid formulation of a chemically defined medium for metabolic profiling of industrially important microbes
Source: PubMed Central journal article supplement (PMC6561596; doi:10.1371/journal.pone.0218208), 2019-06-12
Supplement: pone.0218208.s006.pdf [file pone.0218208.s006.pdf]

| Predictor variable                            | VIP score | Centred & scaled coefficient | Predictor Variable                               | VIP score | Centred & scaled coefficient |
|-----------------------------------------------|-----------|------------------------------|--------------------------------------------------|-----------|------------------------------|
| Citric acid                                   | 2.6896    | -0.3598                      | Ammonium chloride*Urea                           | 0.5227    | -0.0699                      |
| Block[8]                                      | 2.1146    | 0.2463                       | MOPS                                             | 0.4635    | -0.062                       |
| EDTA                                          | 2.0562    | -0.2751                      | Ammonium nitrate                                 | 0.419     | -0.0561                      |
| Yeast extract                                 | 1.9781    | 0.2646                       | Ammonium nitrate*Sodium carbonate                | 0.3909    | -0.0523                      |
| Ammonium nitrate*Potassium nitrate            | 1.9257    | -0.2576                      | Ammonium nitrate*Dipotassium hydrogen phosphate  | 0.3852    | -0.0515                      |
| Sodium carbonate                              | 1.8407    | 0.2462                       | Potassium nitrate                                | 0.3605    | 0.0482                       |
| Ammonium chloride*Sodium dihydrogen phosphate | 1.7708    | -0.2369                      | Dipotassium hydrogen phosphate                   | 0.3462    | -0.0463                      |
| Ammonium chloride*Iron sulphate               | 1.5984    | 0.2138                       | Ammonium chloride*Sodium chloride                | 0.3372    | 0.0451                       |
| Block[1]                                      | 1.4855    | 0.173                        | Ammonium nitrate*Calcium chloride                | 0.3071    | 0.0411                       |
| Block[3]                                      | 1.4559    | -0.1696                      | Block[4]                                         | 0.2963    | 0.0345                       |
| Calcium chloride                              | 1.3461    | 0.1801                       | Ammonium chloride*Potassium sulphate             | 0.2913    | 0.039                        |
| Block[7]                                      | 1.2982    | -0.1512                      | Ammonium chloride*Amino acids 100x               | 0.2809    | -0.0376                      |
| Ammonium nitrate*EDTA                         | 1.2214    | 0.1634                       | NTA(0,1)                                         | 0.229     | 0.0306                       |
| Ammonium sulphate*Potassium nitrate           | 1.141     | -0.1526                      | Ammonium sulphate*Yeast extract                  | 0.2238    | -0.0299                      |
| Potassium sulphate                            | 1.1389    | -0.1523                      | Potassium sulphate*Yeast extract                 | 0.2186    | -0.0292                      |
| Magnesium sulphate                            | 1.0842    | 0.145                        | Ammonium chloride*Magnesium sulphate             | 0.2112    | 0.0282                       |
| Block[6]                                      | 1.0113    | -0.1178                      | Ammonium chloride*Ammonium sulphate              | 0.1791    | 0.024                        |
| Iron sulphate                                 | 0.9676    | 0.1294                       | Ammonium sulphate                                | 0.167     | 0.0223                       |
| Ammonium chloride*Vitamins 100x               | 0.8741    | 0.1169                       | Ammonium chloride*Trace metals 500x              | 0.1379    | -0.0184                      |
| Ammonium chloride*Potassium nitrate           | 0.8636    | 0.1155                       | Ammonium chloride*Dipotassium hydrogen phosphate | 0.1268    | -0.017                       |
| Block[2]                                      | 0.8322    | -0.0969                      | Vitamins 100x                                    | 0.1244    | 0.0166                       |
| Ammonium chloride*Yeast extract               | 0.785     | 0.105                        | Ammonium chloride                                | 0.1082    | 0.0145                       |
| Sodium chloride                               | 0.7826    | 0.1047                       | Ammonium chloride*Calcium chloride               | 0.1056    | -0.0141                      |
| Ammonium nitrate*Iron sulphate                | 0.7498    | -0.1003                      | Ammonium chloride*Sodium carbonate               | 0.0983    | 0.0132                       |
| Block[5]                                      | 0.7012    | 0.0817                       | Urea                                             | 0.0757    | 0.0101                       |
| Ammonium chloride*Ammonium nitrate            | 0.6977    | -0.0933                      |                                                  |           |                              |
| Amino acids 100x                              | 0.6966    | 0.0932                       |                                                  |           |                              |
| Ammonium chloride*EDTA                        | 0.687     | -0.0919                      |                                                  |           |                              |
| Ammonium nitrate*Ammonium sulphate            | 0.6287    | 0.0841                       |                                                  |           |                              |
| Ammonium chloride*NTA                         | 0.6166    | -0.0825                      |                                                  |           |                              |
| Sodium dihydrogen phosphate                   | 0.5506    | -0.0737                      |                                                  |           |                              |
| Trace metals 500x                             | 0.5407    | -0.0723                      |                                                  |           |                              |

**Table S6. PLS Variable Importance in Projection (VIP) scores and centred and scaled model coefficients for media ingredients and interactions (\*) from the first DoE iteration.**

Sorted in descending order of VIP (*i.e.* those factors that are predicted to have the strongest influence on final culture densities are listed first).
