# Supplementary material for: A design of experiments approach for the rapid formulation of a chemically defined medium for metabolic profiling of industrially important microbes
Source: PubMed Central journal article supplement (PMC6561596; doi:10.1371/journal.pone.0218208), 2019-06-12
Supplement: pone.0218208.s007.pdf [file pone.0218208.s007.pdf]

| Predictor variable                  | VIP score | Centred & scaled coefficient | Predictor Variable                  | VIP score | Centred & scaled coefficient |
|-------------------------------------|-----------|------------------------------|-------------------------------------|-----------|------------------------------|
| Yeast extract(0,0.1)                | 4.8926    | 0.6728                       | Ammonium chloride*Yeast extract     | 0.4708    | 0.0196                       |
| Block[4]                            | 1.4371    | -0.1359                      | Block[5]                            | 0.4708    | 0.0264                       |
| Block[6]                            | 1.2377    | 0.0473                       | Sodium carbonate*Bis-Tris           | 0.4301    | -0.0675                      |
| Block[7]                            | 1.2033    | -0.1189                      | Ammonium sulphate*Yeast extract     | 0.4283    | 0.0678                       |
| Phosphate buffer                    | 1.1587    | 0.1739                       | Ammonium chloride*Sodium chloride   | 0.4276    | -0.0318                      |
| Block[1]                            | 1.1513    | 0.0809                       | Ammonium sulphate*Phosphate buffer  | 0.4257    | -0.0489                      |
| Sodium chloride*Urea                | 1.0825    | 0.0153                       | Potassium nitrate                   | 0.3852    | -0.0017                      |
| Potassium nitrate*Urea              | 1.076     | -0.1022                      | Sodium carbonate*Urea               | 0.3835    | 0.0342                       |
| Phosphate buffer*Bis-Tris           | 1.0651    | 0.0755                       | Ammonium chloride*Urea              | 0.3696    | -0.0591                      |
| Sodium chloride*Bis-Tris            | 1.064     | -0.091                       | Ammonium sulphate*Potassium nitrate | 0.3634    | -0.0585                      |
| Sodium chloride*Phosphate buffer    | 1.0485    | -0.1062                      | Sodium chloride                     | 0.3523    | -0.0469                      |
| Bis-Tris*Yeast extract              | 1.0452    | 0.1541                       | Sodium chloride*Yeast extract       | 0.3454    | -0.0388                      |
| Potassium nitrate*Bis-Tris          | 1.0344    | -0.047                       | Urea*Yeast extract                  | 0.2733    | -0.0415                      |
| Ammonium sulphate*Sodium carbonate  | 1.034     | -0.0502                      | Ammonium chloride                   | 0.2696    | 0.0321                       |
| Potassium nitrate*Phosphate buffer  | 1.0279    | -0.1126                      | Sodium carbonate*Yeast extract      | 0.2623    | 0.0112                       |
| Potassium nitrate*Sodium carbonate  | 0.9046    | 0.0376                       | Block[2]                            | 0.2243    | 0.036                        |
| Urea*Bis-Tris                       | 0.8839    | -0.0828                      | Sodium carbonate                    | 0.188     | -0.0045                      |
| Phosphate buffer*Urea               | 0.8364    | -0.075                       | Ammonium chloride*Bis-Tris          | 0.1668    | -0.0118                      |
| Potassium nitrate*Yeast extract     | 0.8295    | -0.0522                      | Ammonium sulphate*Sodium chloride   | 0.1508    | -0.0225                      |
| Bis-Tris                            | 0.7818    | 0.1258                       | Sodium carbonate*Sodium chloride    | 0.1211    | 0.0122                       |
| Phosphate buffer*Yeast extract      | 0.7227    | 0.02                         | Ammonium chloride*Phosphate buffer  | 0.0855    | 0.006                        |
| Potassium nitrate*Sodium chloride   | 0.7223    | 0.0788                       |                                     |           |                              |
| Sodium carbonate*Phosphate buffer   | 0.6959    | -0.1019                      |                                     |           |                              |
| Ammonium sulphate                   | 0.6726    | -0.0302                      |                                     |           |                              |
| Ammonium chloride*Sodium carbonate  | 0.6646    | 0.0257                       |                                     |           |                              |
| Ammonium chloride*Potassium nitrate | 0.6557    | -0.1042                      |                                     |           |                              |
| Urea                                | 0.5992    | 0.0355                       |                                     |           |                              |
| Ammonium sulphate*Urea              | 0.5921    | -0.069                       |                                     |           |                              |
| Ammonium sulphate*Bis-Tris          | 0.5511    | 0.0122                       |                                     |           |                              |
| Ammonium chloride*Ammonium sulphate | 0.5437    | -0.0671                      |                                     |           |                              |
| Block[3]                            | 0.4979    | 0.0642                       |                                     |           |                              |

**Table S7. PLS Variable Importance in Projection (VIP) scores and centred and scaled model coefficients for media ingredients and interactions (\*) from the second DoE iteration.**

Sorted in descending order of VIP (*i.e.* those factors that are predicted to have the strongest influence on final culture densities are listed first).
