# Supplementary material for: A design of experiments approach for the rapid formulation of a chemically defined medium for metabolic profiling of industrially important microbes
Source: PubMed Central journal article supplement (PMC6561596; doi:10.1371/journal.pone.0218208), 2019-06-12
Supplement: pone.0218208.s008.pdf [file pone.0218208.s008.pdf]

| Terms Included in Model                                                                                                                                              | Number of Terms | RSquare | RMSE   | AICc      | $\Delta_i$ |
|----------------------------------------------------------------------------------------------------------------------------------------------------------------------|-----------------|---------|--------|-----------|------------|
| Ammonium chloride, Phosphate buffer, Yeast extract, Potassium nitrate*Sodium chloride, Phosphate buffer*Bis-Tris, Phosphate buffer*Yeast extract                     | 6               | 0.8436  | 0.0844 | -106.362  | 0          |
| Phosphate buffer, Yeast extract, Potassium nitrate*Sodium chloride, Phosphate buffer*Bis-Tris, Phosphate buffer*Yeast extract, Bis-Tris*Yeast extract                | 6               | 0.8435  | 0.0844 | -106.3123 | 0.0497     |
| Phosphate buffer, Yeast extract, Potassium nitrate*Sodium chloride, Potassium nitrate*Yeast extract, Phosphate buffer*Bis-Tris, Phosphate buffer*Yeast extract       | 6               | 0.8434  | 0.0845 | -106.2805 | 0.0815     |
| Phosphate buffer, Yeast extract, Potassium nitrate*Sodium chloride, Sodium chloride*Phosphate buffer, Phosphate buffer*Bis-Tris, Phosphate buffer*Yeast extract      | 6               | 0.8411  | 0.0851 | -105.4411 | 0.9209     |
| Phosphate buffer, Yeast extract, Potassium nitrate*Sodium chloride, Phosphate buffer*Bis-Tris, Phosphate buffer*Yeast extract                                        | 5               | 0.8331  | 0.0863 | -105.4359 | 0.9261     |
| Phosphate buffer, Yeast extract, Potassium nitrate*Sodium chloride, Potassium nitrate*Yeast extract, Phosphate buffer*Bis-Tris, Bis-Tris*Yeast extract               | 6               | 0.841   | 0.0851 | -105.4316 | 0.9304     |
| Yeast extract, Potassium nitrate*Sodium chloride, Potassium nitrate*Yeast extract, Phosphate buffer*Bis-Tris, Phosphate buffer*Yeast extract, Bis-Tris*Yeast extract | 6               | 0.8406  | 0.0852 | -105.269  | 1.093      |
| Phosphate buffer, Yeast extract, Potassium nitrate*Sodium chloride, Sodium chloride*Phosphate buffer, Phosphate buffer*Bis-Tris, Bis-Tris*Yeast extract              | 6               | 0.8401  | 0.0854 | -105.111  | 1.251      |
| Phosphate buffer, Yeast extract, Potassium nitrate*Sodium chloride, Phosphate buffer*Bis-Tris, Bis-Tris*Yeast extract                                                | 5               | 0.8307  | 0.087  | -104.6427 | 1.7193     |
| Phosphate buffer, Yeast extract, Potassium nitrate*Sodium chloride, Potassium nitrate*Phosphate buffer, Phosphate buffer*Bis-Tris, Phosphate buffer*Yeast extract    | 6               | 0.8386  | 0.0858 | -104.5895 | 1.7725     |
| Phosphate buffer, Yeast extract, Ammonium sulphate*Yeast extract, Potassium nitrate*Sodium chloride, Phosphate buffer*Bis-Tris, Phosphate buffer*Yeast extract       | 6               | 0.8384  | 0.0858 | -104.5265 | 1.8355     |
| Sodium chloride, Phosphate buffer, Yeast extract, Potassium nitrate*Sodium chloride, Phosphate buffer*Bis-Tris, Phosphate buffer*Yeast extract                       | 6               | 0.8383  | 0.0858 | -104.4707 | 1.8913     |
| Ammonium chloride, Phosphate buffer, Yeast extract, Potassium nitrate*Sodium chloride, Phosphate buffer*Bis-Tris, Bis-Tris*Yeast extract                             | 6               | 0.8382  | 0.0859 | -104.4308 | 1.9312     |
| Phosphate buffer, Yeast extract, Ammonium chloride*Sodium carbonate, Potassium nitrate*Sodium chloride, Phosphate buffer*Bis-Tris, Bis-Tris*Yeast extract            | 6               | 0.838   | 0.0859 | -104.3734 | 1.9886     |
| Phosphate buffer, Yeast extract, Potassium nitrate*Sodium chloride, Sodium carbonate*Phosphate buffer, Phosphate buffer*Bis-Tris, Phosphate buffer*Yeast extract     | 6               | 0.838   | 0.0859 | -104.3707 | 1.9913     |

**Table S8: Measures of fit for 15 stepwise regression models of the results of the second DoE iteration.**

All possible linear regression models were fit to the data, with Heredity Restriction and a maximum of 6 terms per model. The goodness-of-fit of each of the resulting 9,531,039 models was assessed using the Akaike Information Criterion (AICc). For each candidate model (*j*), the Kullback-Leibler distance from the optimum model (*i.e.* the model with the smallest AICc) was calculated as

$\Delta_i = AICc_i - AICc_{min}$ . Models were selected for further interrogation when  $\Delta_i$  was less than 2.0 (Burnham *et al.*, 2010). The 15 selected models are listed in the table in ascending order of  $\Delta_i$ .
